# Supplementary material for: Phase 1 Dose Escalation Study of the Allosteric AKT Inhibitor BAY 1125976 in Advanced Solid Cancer—Lack of Association between Activating AKT Mutation and AKT Inhibition-Derived Efficacy
Source: PubMed Central journal article supplement (PMC6966663; doi:10.3390/cancers11121987), 2019-12-10
Supplement: cancers-11-01987-s001.pdf [file cancers-11-01987-s001.pdf]

**Table S1.** Baseline characteristics of patients—site of disease.

| Site of disease           | 10 mg<br>LSF<br>QD | 20 mg<br>LSF<br>QD | 40 mg<br>Tablet<br>QD | 80 mg<br>Tablet<br>QD | 120 mg<br>Tablet<br>QD | 40 mg<br>Tablet<br>BID | 60 mg<br>Tablet<br>BID | 80 mg<br>Tablet<br>BID | 60 mg Expansion<br>Tablet<br>BID | Total      |
|---------------------------|--------------------|--------------------|-----------------------|-----------------------|------------------------|------------------------|------------------------|------------------------|----------------------------------|------------|
| N (%)                     | 3 (100%)           | 3 (100%)           | 4 (100%)              | 13 (100%)             | 6 (100%)               | 3 (100%)               | 15 (100%)              | 4 (100%)               | 28 (100%)                        | 79 (100%)  |
| Abdomen                   | 0                  | 0                  | 0                     | 1 (7.7%)              | 1 (16.7%)              | 0                      | 0                      | 0                      | 0                                | 2 (2.5%)   |
| Bone                      | 0                  | 1 (33.3%)          | 1 (25.0%)             | 5 (38.5%)             | 1 (16.7%)              | 0                      | 3 (20.0%)              | 1 (25.0%)              | 20 (71.4%)                       | 32 (40.5%) |
| Breast                    | 0                  | 0                  | 0                     | 0                     | 0                      | 0                      | 0                      | 0                      | 1 (3.6%)                         | 1 (1.3%)   |
| Hilar lymph node          | 1 (33.3%)          | 2 (66.7%)          | 0                     | 0                     | 0                      | 0                      | 0                      | 0                      | 0                                | 3 (3.8%)   |
| Internal iliac lymph node | 0                  | 0                  | 1 (25.0%)             | 0                     | 0                      | 0                      | 0                      | 0                      | 0                                | 1 (1.3%)   |
| Kidney                    | 0                  | 0                  | 0                     | 0                     | 1 (16.7%)              | 0                      | 0                      | 0                      | 0                                | 1 (1.3%)   |
| Liver                     | 0                  | 1 (33.3%)          | 1 (25.0%)             | 6 (46.2%)             | 2 (33.3%)              | 0                      | 6 (40.0%)              | 2 (50.0%)              | 26 (92.9%)                       | 44 (55.7%) |
| Liver hilum lymph node    | 0                  | 0                  | 0                     | 0                     | 0                      | 0                      | 1 (6.7%)               | 0                      | 0                                | 1 (1.3%)   |
| Mediastinal lymph node    | 1 (33.3%)          | 0                  | 0                     | 1 (7.7%)              | 0                      | 0                      | 0                      | 0                      | 0                                | 2 (2.5%)   |
| Other                     | 3 (100.0%)         | 3 (100.0%)         | 4 (100.0%)            | 10 (76.9%)            | 4 (66.7%)              | 3 (100.0%)             | 12 (80.0%)             | 3 (75.0%)              | 17 (60.7%)                       | 59 (74.7%) |
| Para-aortic lymph node    | 0                  | 1 (33.3%)          | 0                     | 1 (7.7%)              | 0                      | 0                      | 2 (13.3%)              | 0                      | 0                                | 4 (5.1%)   |
| Parasternal lymph node    | 0                  | 0                  | 0                     | 0                     | 0                      | 0                      | 1 (6.7%)               | 0                      | 0                                | 1 (1.3%)   |
| Paratracheal lymph node   | 0                  | 0                  | 0                     | 0                     | 1 (16.7%)              | 0                      | 0                      | 0                      | 0                                | 1 (1.3%)   |
| Portal lymph node         | 0                  | 0                  | 1 (25.0%)             | 0                     | 0                      | 0                      | 1 (6.7%)               | 0                      | 1 (3.6%)                         | 3 (3.8%)   |
| Retroperitoneum           | 0                  | 0                  | 1 (25.0%)             | 1 (7.7%)              | 0                      | 0                      | 0                      | 1 (25.0%)              | 0                                | 3 (3.8%)   |

**Table S2.** Non-compartmental pharmacokinetic parameters of BAY 1125976 after single and multiple dosing.

| Parameter                   | Dose, Formulation, Schedule     |                                 |                                         |                                        |                                         |                            |                                       |                                 |                                         |
|-----------------------------|---------------------------------|---------------------------------|-----------------------------------------|----------------------------------------|-----------------------------------------|----------------------------|---------------------------------------|---------------------------------|-----------------------------------------|
|                             | 10 mg                           | 20 mg                           | 40 mg                                   | 80 mg                                  | 120 mg                                  | 40 mg                      | 60 mg                                 | 80 mg                           | 60 mg                                   |
|                             | LSF<br>QD                       | LSF<br>QD                       | Tablet<br>QD                            | Tablet<br>QD                           | Tablet<br>QD                            | Tablet<br>BID              | Tablet<br>BID                         | Tablet<br>BID                   | Expansion Tablet<br>BID                 |
| N                           | 3                               | 3                               | 4                                       | 13                                     | 6                                       | 3                          | 15                                    | 4                               | 9                                       |
| Cycle 1, Day 1              |                                 |                                 |                                         |                                        |                                         |                            |                                       |                                 |                                         |
| $C_{max}$ (µg/L)            | 2.65 / 66.5<br>(1.36–4.44)      | 8.00 / 32.0<br>(6.45–11.4)      | 8.65 / 65.1<br>(3.76–13.5)              | 38.5 / 49.9<br>(15.7–78.6)             | 36.9 / 47.2<br>(17.6–69.3)              | 13.5 / 32.1<br>(9.4–16.6)  | 23.1 / 72.9<br>(7.51–58.1)            | 26.0 / 24.4<br>(20.6–36.4)      | 17.3 / 85.9<br>(5.83–52.7)              |
| AUC (µg * h/L)              | –/–<br>(28.5–30.3) <sup>a</sup> | 95.4 / 93.2<br>(59.1–238)       | 74.0 / 8.76<br>(67.0–79.1) <sup>b</sup> | 289 / 54.9<br>(98.4–739)               | 235 / 42.7<br>(122–322)                 | –                          | –                                     | –                               | –                                       |
| $t_{max}$ (h) <sup>d</sup>  | 1.0<br>(0.5–3.9)                | 1.9<br>(1.1–2.0)                | 1.8<br>(1.0–8.0)                        | 1.0<br>(0.5–4.1)                       | 1.3<br>(1.0–2.1)                        | 1.0<br>(1.0–3.0)           | 2.0<br>(0.5–4.0)                      | 3.0<br>(0.8–4.0)                | 2.0<br>(1.0–4.0)                        |
| Cycle 2, Day 1              |                                 |                                 |                                         |                                        |                                         |                            |                                       |                                 |                                         |
| $C_{max}$ (µg/L)            | 2.17 / 50.0<br>(1.26–3.04)      | –/–<br>(6.76–9.48) <sup>a</sup> | 9.21 / 69.6<br>(3.99–16.5)              | 37.7 / 87.1<br>(13.8–123) <sup>c</sup> | 44.5 / 26.8<br>(36.1–59.9) <sup>b</sup> | 18.0 / 36.5<br>(12.0–23.3) | 33.4 / 101<br>(10.0–131) <sup>e</sup> | –/–<br>(32.4–84.2) <sup>a</sup> | 40.4 / 73.9<br>(18.9–84.6) <sup>g</sup> |
| AUC (µg * h/L) <sup>f</sup> | 13.4 / 43.6<br>(8.89–20.5)      | –/–<br>(65.7–106) <sup>a</sup>  | 127 / 19.2<br>(106–156)                 | 363 / 93.0<br>(94.5–1010) <sup>c</sup> | 294 / 19.9<br>(240–356) <sup>b</sup>    | 94.0 / 22.4<br>(81.6–121)  | 177 / 80.7<br>(76.5–824) <sup>e</sup> | –/–<br>(186–387) <sup>a</sup>   | 195 / 44.0<br>(111–347) <sup>g</sup>    |
| $t_{max}$ (h) <sup>d</sup>  | 0.6<br>(0.5–1.0)                | –<br>(1.1–1.9) <sup>a</sup>     | 2.1<br>(1.0–4.1)                        | 2.0<br>(1.0–4.1) <sup>c</sup>          | 2.0<br>(1.5–2.0) <sup>b</sup>           | 1.0<br>(1.0–2.0)           | 2.0<br>(1.0–4.1) <sup>e</sup>         | –<br>(1.0–1.0) <sup>a</sup>     | 1.5<br>(0.5–4.2) <sup>g</sup>           |

The pharmacokinetics analysis set consisted of 60 patients. Shown is the geometric mean, % coefficient of variation and range for single (Cycle 1, Day 1) and multiple (Cycle 2, Day 1) dosing of BAY 1125976. Single dose PK was assessed in the QD schedule only. <sup>a</sup>  $n = 2$ ; <sup>b</sup>  $n = 3$ ; <sup>c</sup>  $n = 8$ ; <sup>d</sup> median (range); <sup>e</sup>  $n = 11$ ; <sup>f</sup> shown is AUC (0- $t_{last}$ ); <sup>g</sup>  $n = 6$ .

**Table S3.** Relative bioavailability. Comparison of a liquid versus solid formulation of BAY 1125976 at dose levels 20 mg and 40 mg QD (geometric mean (%CV)).

| Parameter                           | Dose, Formulation, Schedule |                         |                      |                          |
|-------------------------------------|-----------------------------|-------------------------|----------------------|--------------------------|
|                                     | 20 mg QD                    |                         | 40 mg QD             |                          |
|                                     | LSF<br>(C1D1); n = 3        | Tablet<br>(C1D3); n = 3 | LSF<br>(C1D1); n = 4 | Tablet<br>(C1D3); n = 4  |
| $C_{max}/D^*$ ( $1/L * 10^{-3}$ )   | 0.372 (36.4)                | 0.456 (39.1)            | 0.207 (62.7)         | 0.216 (65.1)             |
| $AUC(0-48)/D^*$ ( $h/L * 10^{-3}$ ) | 4.23 (91.0)                 | 3.91 (75.0)             | 1.88 (18.2)          | 1.80 (8.30) <sup>b</sup> |
| $t_{max}^a$ (h)                     | 1.9 (1.1-2.0)               | 1.1 (1.0-2.0)           | 2.5 (1.0-4.2)        | 1.8 (1.0-8.0)            |

C: cycle, D: day; <sup>a</sup> median (range); <sup>b</sup> n = 3.

**Table S4.** Food effect. Pharmacokinetic parameters of BAY 1125976 in plasma after single dose of BAY 1125976 given in fasted vs. fed condition (geometric mean (%CV)).

| Parameter                                         | 80 mg QD                        |                                   |
|---------------------------------------------------|---------------------------------|-----------------------------------|
|                                                   | Fed condition<br>(C1D-3); n = 3 | Fasted condition<br>(C1D1); n = 3 |
| $C_{max}$ ( $\mu\text{g}/\text{L}$ )              | 21.1 (36.6)                     | 28.8 (64.9)                       |
| $AUC(0-48)$ ( $\mu\text{g} * \text{h}/\text{L}$ ) | 192 (52.7)                      | 165 (52.4)                        |
| $t_{max}^a$ (h)                                   | 4.1 (1.0-4.1)                   | 1.0 (0.5-2.1)                     |

C: cycle, D: day; <sup>a</sup> median (range)

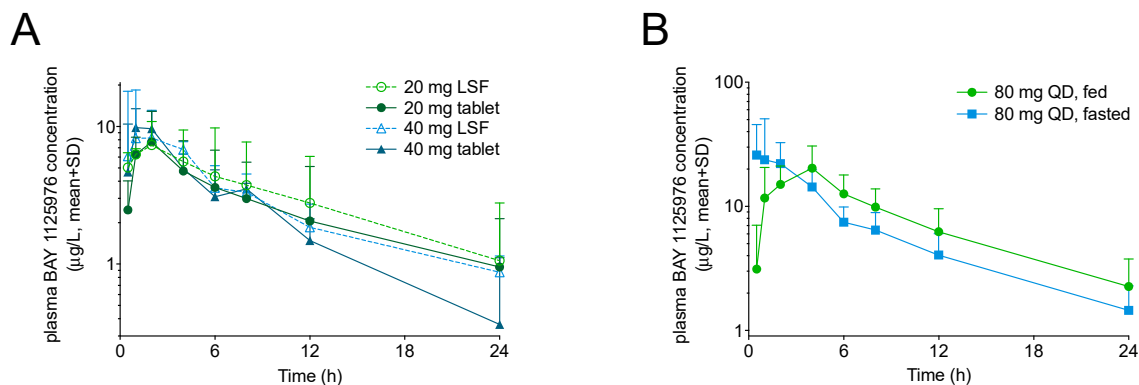

**Figure S1.** (A) Relative bioavailability of liquid vs. tablet formulation showing bioequivalence at two tested dose levels. (B) Food effect assessment at 80 mg QD.
